1 **Multicenter Comparison of AI Deep Learning Reconstruction, Iterative Reconstruction, and**  
2 **Filtered Back Projection for Coronary Artery Calcification Scoring**

3  
4  
5

6 Alena R. Winkler<sup>1¶</sup>, June D. Campos<sup>1a¶</sup>, Mark L. Winkler<sup>1a¶\*</sup>

7  
8

9 <sup>1</sup> Department of Radiology, Steinberg Diagnostic Medical Imaging, Las Vegas, Nevada, United  
10 States of America

11 <sup>a</sup> Current Address: Department of Radiology, Steinberg Diagnostic Medical Imaging, 7301 Peak  
12 Dr., Ste 200, Las Vegas, NV 89128

13

14 \* Corresponding author

15 Email: mlwlv@cox.net

16  
17

18 <sup>¶</sup>These authors contributed equally to this work

19  
20

21 **ABSTRACT**

22 **Objective**

23 To validate the feasibility of AI Deep Learning Reconstruction for Coronary Artery Calcification  
24 Scoring in order to decrease radiation exposure on a 4cm detector CT scanner. This is the first  
25 such validation on devices that are most commonly utilized for this procedure.

26 **Methods**

27 Data from 105 consecutive patients referred for Coronary Artery Calcification Scoring (CACS) in  
28 4 centers was reconstructed with Filtered Back Projection (FBP), Iterative Reconstruction  
29 (Hybrid-IR), and AI Deep Learning Reconstruction (AI DLR), and analyzed both quantitatively and  
30 qualitatively to determine if AI DLR can be routinely used for this purpose. Additional phantom  
31 testing was performed to determine if further dose reduction can be accomplished with AI DLR  
32 while maintaining or improving image quality compared to current Hybrid-IR reconstruction.

33 **Results**

34 Quantitatively, there was excellent agreement between the three reconstructions (FBP, Hybrid IR  
35 and AI DLR) with an interclass coefficient of 0.99. The mean CACS for Filtered Back Projection  
36 Reconstructions was 111.05. The mean CACS for Hybrid-IR was 91.30. The mean CACS for AI  
37 Deep Learning Reconstructions was 93.50. Qualitatively, image quality was consistently better  
38 with AI DLR than with Hybrid-IR at both soft tissue and lung windowing. Based on our phantom  
39 experiments, AI DLR allows for dose reduction of at least a 37% without any image quality  
40 penalty compared to Hybrid-IR.

## 41 **Conclusions**

42 The use of AI DLR for use in CACS on 4 cm coverage CT scanner has been quantitatively and  
43 qualitatively validated for use for the first time. AI DLR produces qualitatively and quantitatively  
44 better image quality than Hybrid-IR at the same dose level, and produces good agreement in  
45 categorization of Agatston scores. In vivo and in vitro evaluations show that AI DLR will allow  
46 for an at least a 37% further dose reduction on a 4 cm coverage CT scanner.

47

## 48 **INTRODUCTION**

49 Coronary Artery Calcium Scoring (CACS) is a widely available, low cost, non-invasive imaging  
50 test which measures the amount of calcified plaque in the coronary arteries. This score is  
51 utilized to assess the risk of coronary artery disease, guide lifestyle modification and  
52 therapeutic treatment, and monitor disease progression and response to treatment [1,2,3].

53 A patient's level of CACS may be described by the Agaston score based on a low-dose CT scan of  
54 the heart. The Agaston score quantifies the amount of calcified plaque in the coronary arteries.  
55 Each calcified plaque is given a score calculated by multiplying the area of the calcified plaque  
56 by a scale factor determined by maximum density of the plaque [4,5]. The patient score is a  
57 sum of all individual plaque scores.

58 A score of 0 indicates no identifiable calcified plaque and indicates a very low (less than 5%) risk  
59 of significant obstructive coronary artery disease (CAD). A score of 1-10 indicates minimal  
60 calcified plaque and indicates a low (less than 10%) risk of significant obstructive CAD. A score  
61 of 11-100 indicates mild calcified plaque and indicates a low to moderate risk of significant

62 obstructive CAD with mild stenosis likely present. A score of 101-400 indicates moderate  
63 calcified plaque and indicates a moderate to high risk of significant obstructive CAD with non-  
64 obstructive and obstructive disease likely present. A score of over 400 indicates severe diffuse  
65 calcified plaque and indicates a high risk of CAD with at least one significant obstruction  
66 (greater than 90%) likely present [6].

67 CACS may be associated with a significant radiation dose, ranging from 0.8 to 10.5mSv [7]. Such  
68 radiation doses have been associated with the risks of subsequent tumors [8,9,10,11] and  
69 therefore minimization of dose is of paramount importance.

70 The CACS CT test may be reconstructed with a variety of methods. Hybrid-IR has been proven  
71 to provide lower doses [12, 13, 14, 15, 16, 17] and higher image quality [18, 19] than earlier FBP  
72 methods. A previous study with a phantom and human subjects scanned with a wide area  
73 detector scanner (16 cm) found that DLR significantly reduced image noise but produced no  
74 significant differences in measured calcium volumes [20]. In this study quantification of  
75 coronary artery calcium was equivalent between FBP, Hybrid-IR and AI-DLR, with AI-DLR having  
76 the lowest bias in measured calcium volumes [20].

77 This study attempts to determine if DLR can supplant Hybrid-IR to then allow for further dose  
78 reduction and improved safety, as suggested in prior studies [18,20, 21] on non-wide area  
79 detector CT scanner.

80

81

82

## 83 MATERIALS and METHODS

84 This retrospective study was approved by SDMI's institutional Ethics Committee with a waiver  
85 of informed consent. 105 consecutive patients referred for Coronary Artery Calcium Scoring  
86 (CACS) in 4 outpatient centers between March 4, 2024, and June 18, 2024, were studied as part  
87 of our institution's routine quality improvement process. Deidentified records were accessed  
88 between March 17 and July 1, 2024, for the purposes of this study.

89 There were 57 males and 48 females. CACS studies were performed on CT scanners with 80  
90 row, 4 cm detectors (Prime SP, Canon Medical Systems [93 patients] and Serve SP, Canon  
91 Medical Systems [12 patients]). Studies were cardiac gated with a step and shoot technique at a  
92 rotation time of 0.35s. Tube voltage was 120 kV for all studies. Data was acquired at 0.5mm  
93 slice thickness and reconstruction at a 3mm slice thickness.

94 Automated exposure control was set to a standard deviation of the noise target of 45 (SD=45)  
95 based on the Hybrid-IR model at a 3mm reconstructed slice thickness. This standard deviation  
96 level was selected from our prior clinical testing as the level at which non-obese (BMI under 30  
97 kg/m<sup>2</sup>) patients would be exposed to a dose under 1 mSv for their CACS exam.

98 Scanning was performed from 1.5cm above the coronary arteries to 1.5 cm below the left  
99 ventricle. Determination of the scan range was assisted by an optical patient positioning system  
100 and a low dose 3D localizing scan.

101 Data was reconstructed utilizing three methods: Filtered Back Projection, Hybrid-IR (AIDR,  
102 Standard Level), and AI Deep Learning Reconstruction (AiCE, Standard Level).

103 Dose was calculated as the product of Dose Length Product multiplied by the Chest k factor of  
104 0.014 as specified by American Association of Physicists in Medicine report of January 2008  
105 [22].

106 Quantitative and qualitative CACS was performed by two experienced cardiac imagers with a  
107 combined total of 41 years of cardiac imaging experience. A Vitrea workstation (Vitrea  
108 Advanced Visualization, Canon Medical Systems) was used to generate the Agaston scores.

109 A qualitative image quality assessment of reconstruction algorithms was done using a soft  
110 tissue (L40, W350) and lung (L-650, W1600) window settings. The relative change in image  
111 quality was done using a +/- 3 scale, with 0 being no clinical diagnostic difference, +/- 1 being  
112 mild clinical diagnostic difference, +/- 2 being moderate clinical diagnostic difference, and +/-3  
113 being significant clinical diagnostic difference with the Hybrid-IR image quality set as the  
114 reference level of zero.

115 Phantom scans to evaluate the effects of the reconstruction algorithm on radiation dose and  
116 image noise were performed using a Catphan 500 phantom (Phantom Laboratory, Salem, NY,  
117 USA). To evaluate the dose reduction that could be achieved by changing the reconstruction  
118 method for a fixed noise target, scans were performed with noise targets ranging from SD = 10  
119 to SD = 60. The phantom was scanned and scan doses recorded with Hybrid-IR set as the  
120 reconstruction method and repeated with AI DLR set as the reconstruction method.

121 To quantitatively evaluate the noise levels produced by each reconstruction method, images from  
122 all scans were reconstructed with FBP, Hybrid-IR and AI DLR. Image noise was measured at the  
123 central three slices of the uniformity section of the phantom, using a circular ROI approximately

124 100 cm<sup>2</sup> in size at the center of the image. These measurements provide a quantitative  
125 assessment of noise of each reconstruction method at a fixed scan dose, as well as indicators of  
126 potential dose reductions at fixed levels of image noise.

127 Since the data did not follow a normal gaussian distribution the interclass coefficient measure  
128 was used to evaluate the agreement between the three different reconstructions. The Fleiss  
129 Kappa statistic ( $\kappa$ ) was calculated to evaluate the agreement of AI-DLR and FBP with the  
130 standard of care reconstruction (Hybrid-IR) [23].

131

## 132 **RESULTS**

### 133 QUANTITATIVE

134 Patient ages ranged from 27 to 77 with a mean age of 55.7 years. Body Mass Indices (BMI)  
135 ranged from 16.7 to 39.5 with a mean of 27.5 kg/m<sup>2</sup>.

136 The mean CACS for Filtered Back Projection Reconstructions was 111.05. The mean CACS for  
137 Hybrid-IR was 91.30. The mean CACS for AI Deep Learning Reconstructions was 93.50 (Figure 1).

138 All reconstructions FBP, Hybrid-IR and AI -DLR were tested for normality and had D values of  
139 0.3573, 0.3681 and 0.3610 and  $P < 0.0001$  which rejects normality of this data. Therefore, an

140 interclass correlation coefficient, which describes the degrees of consistency among

141 measurements, was calculated and found to be 0.99 for the average measures for all 3

142 reconstructions. This indicates excellent agreement between measurements obtained using the

143 3 reconstruction methods.

144

145 **Figure 1. Comparison of Mean CACS across reconstruction types.**

146

147 Figure 2 shows the distribution of CACS in each of the risk categories. No coronary calcification  
148 (score 0) was seen for 51 patients with FBP, 61 patients with Hybrid-IR, and 58 patients with AI  
149 DLR (Figure 2). The kappa statistic ( $\kappa$ ) between those patients who were in the CACS category of  
150 0 for AI DLR and Hybrid-IR was  $0.94 \pm 0.03$  while the  $\kappa$  between Hybrid IR and FBP was  $0.81 \pm$   
151  $0.05$ . The two reconstructions (AI DLR and FBP) show strong agreement with Hybrid for those  
152 patients with zero calcium.

153

154 **Figure 2. Relative occurrence of CACS values as a function of reconstruction type.**

155

156 Minimal coronary calcification (score 1-10) was seen for 14 patients with FBP, 9 patients with  
157 Hybrid-IR, and 9 patients with AI DLR. The kappa statistic ( $\kappa$ ) for AI DL and Hybrid IR was  $0.64 \pm$   
158  $0.14$  while, the  $\kappa$  between Hybrid IR and FBP was only  $0.27 \pm 0.14$ .  
159 Mild coronary calcification (score 11-100) was seen for 16 patients with FBP, 13 patients with  
160 Hybrid-IR, and 16 patients with AI DLR. The kappa statistic ( $\kappa$ ) for those patients in the mild  
161 coronary calcification category between AI DLR and Hybrid-IR was  $0.80 \pm 0.09$ , which is a strong  
162 agreement while  $\kappa$  between Hybrid IR and FBP was  $0.72 \pm 0.1$ .



163 Moderate coronary calcification (score 101-400) was seen for 18 patients with FBP, 17 patients  
164 with Hybrid-IR, and 17 patients with AI DLR. The kappa statistic ( $\kappa$ ) for those patients in the  
165 moderate coronary calcification category between AI DLR and Hybrid-IR was  $0.92 \pm 0.05$ , which  
166 is still strong agreement while  $\kappa$  between Hybrid IR and FBP was  $0.90 \pm 0.06$ .

167 Severe coronary calcification (score over 400) was seen for 6 patients with FBP, 5 patients with  
168 Hybrid-IR, and 5 patients with AI DLR. The kappa statistic ( $\kappa$ ) between AI DLR and Hybrid-IR was  
169  $1.0 \pm 0.0$ , which is strong agreement while the  $\kappa$  between Hybrid IR and FBP was  $0.9 \pm 0.09$ .

170 Patient dose was exponentially related to BMI by linear regression analysis and is demonstrated  
171 graphically in Figure 3 with a Pearson correlation coefficient of 0.7282 indicating a moderately  
172 strong correlation. The dose range was from 0.225 mSv to 3.10 mSv with a mean dose of 0.795  
173 mSv.

174

175 **Figure 3. Distribution of patient dose as a function of patient size as represented by patient**  
176 **BMI.**

177

178 Phantom measurements showed a reduction in CTDI of approximately 30% when the target  
179 reconstruction method was changed from Hybrid-IR to AI DLR, but with a fixed noise target  
180 (SD). These results are depicted in Figure 4 and Table 1. Table 1 tabulates the CTDI for scans of  
181 the Catphan phantom as the noise target was increased when the scan protocol was setup with  
182 Hybrid-IR and repeated with AI DLR as the reconstruction. From this table the dose for a noise

183 target of 45 (SD=45) which is our clinical protocol, will reduce the dose by 32% simply by  
184 switching the reconstruction being utilized to AI DLR.

185

186 **Table 1. Dose reduction achieved between Hybrid-IR and AI DLR reconstructions.**

| Noise Target (SD) | CTDI Hybrid-IR (mGy) | CTDI AI DLR (mGy) | Reduction in Dose |
|-------------------|----------------------|-------------------|-------------------|
| 15                | 7.68                 | 5.61              | 27%               |
| 20                | 4.41                 | 3.26              | 26%               |
| 25                | 2.97                 | 2.06              | 31%               |
| 28                | 2.39                 | 1.69              | 29%               |
| 29                | 2.27                 | 1.54              | 32%               |
| 30                | 2.06                 | 1.48              | 28%               |
| 35                | 1.51                 | 1.11              | 26%               |
| 40                | 1.18                 | 0.82              | 31%               |
| 45                | 0.97                 | 0.66              | 32%               |
| 50                | 0.80                 | 0.52              | 35%               |
| 55                | 0.66                 | 0.49              | 26%               |
| 60                | 0.49                 | 0.33              | 33%               |

187

188 **Figure 4. Impact of reconstruction target on dose.** For a fixed SD level, switching reconstruction  
189 algorithms from Hybrid-IR to AI DLR results in approximately 30% reduction in radiation dose.

190

191 Noise measurements in phantom images were also used to determine the level of dose  
192 reduction possible with AI DLR to maintain similar noise levels as Hybrid-IR. Figure 5 shows the  
193 effect of the image of reconstruction algorithm on image noise and indicates a dose reduction  
194 of at least a 37% would lead no degradation in AI DLR image noise compared to Hybrid IR AI  
195 DLR yield lower noise levels compared to FBP or Hybrid-IR. To maintain the noise level attained  
196 with Hybrid-IR at a noise target level of 45 (SD=45), a higher noise target (SD = 70) may be used,  
197 and this would lead to a dose reduction of approximately 44%. Dashed arrows in Figure 5  
198 illustrates the opportunity for dose reduction. In our phantom experiments, with noise target  
199 set at SD = 28, a CTDI of 2.4 mGy is administered and noise with Hybrid-IR measures 15.9. To  
200 maintain approximately the same noise level with AI DLR, noise target would need to be set to  
201 SD = 35 and a CDTI of 1.5 mGy would be administered. At this dose level, the noise in the AI-  
202 DLR image was measured to be 16.1. Similarly, with noise target set at SD = 35, a CTDI of 1.5  
203 mGy is administered and noise with Hybrid-IR measures 18.0. To maintain approximately the  
204 same noise level with AI DLR, noise target would need to be set to SD = 55 and a CTDI of 0.66  
205 mGy would be administered. At this dose level, the noise in the AI-DLR image was measured to  
206 be 18.1. These results indicate a dose reduction of between 37% and 56% could be  
207 implemented without any noise penalty in the AI DLR images.

208

209 **Figure 5. Impact of reconstruction algorithm on image noise.** An equivalent noise level may be  
210 realized with AI DLR, but with greater than 36% lower dose compared to Hybrid-IR.

211

212 QUALITATIVE

213 Qualitative image quality differences were consistent across all patients (Figure 6). The AI DLR  
214 image quality was mildly improved (+1 total difference) at soft tissue contrast and moderately  
215 improved (+2 total difference) at lung contrast compared with the Hybrid-IR. The Hybrid-IR  
216 image quality was moderately improved (+2 total difference) at soft tissue contrast and  
217 moderately (+2 total difference) at lung contrast compared with the FBP. The AI DLR was  
218 significantly improved (+3 total difference) at soft tissue contrast and even more significantly  
219 improved (+4 total difference) at lung contrast compared with the FBP.

220

221 **Figure 6. Relative image quality scores from qualitative image quality assessment.**

222

223 **DISCUSSION**

224 The results of this study quantitatively and qualitatively validated the use of AI Deep Learning  
225 Reconstruction for Coronary Artery Calcification Scoring and established that CACS can be  
226 consistently and robustly performed with AI DLR. Such validation results has yet to be reported  
227 for a 4 cm detector CT.

228 The CACS results with DLR show no statistically significant difference in Agaston values from  
229 those produced with those of a previously validated Hybrid-IR technique. However, they are  
230 generally marginally higher with AI DLR (mean 93.50) than with Hybrid-IR (mean 91.50).

231 Possible reason for the differences between AI DLR and FBP is the lower noise in AI DLR

232 removes a positive bias in CACS measurements caused by noise, while the improved spatial  
233 resolution improves the density measurements of small segments of calcium. These results are  
234 consistent with those previously reported [20].

235 There are two phenomena at play when AI DLR is used in the imaging of calcifications, and  
236 especially areas of small calcium deposits. AI DLR images are sharper, so there is less calcium  
237 blooming and smaller calcium deposits are detected more robustly. Secondly, image noise is  
238 lower and as a result systematic biases in measurements are reduced. We believe the higher  
239 noise with FBP leads to more false positive and hence fewer cases classified as CACS = 0 with  
240 FBP compared to Hybrid-IR and AI DLR. Additionally, we believe the increased spatial resolution  
241 of AI-DLR is responsible for more tiny calcifications being detected, explaining the slightly fewer  
242 CAC=0 cases compared to Hybrid-IR.

243

244 This is supported by qualitative image analysis where individual calcifications may appear  
245 sharper and denser on AI DLR and FBP than on Hybrid-IR (Figure 7). It should also be noted that  
246 the FBP images have significantly worse clinical diagnostic quality than the AI DLR images and  
247 would not be advised for routine clinical use at either soft tissue or lung contrast settings. This  
248 is noted in the kappa agreement statistic for minimal calcium classification, which indicates only  
249 fair agreement ( $\kappa = 0.27 \pm 0.14$ ) between the hybrid IR and FBP reconstructions.

250

251 **Figure 7. Example patient images displayed in Soft Tissue (WW = 350, WL = 40) and Lung (WW**  
252 **= 1600, WL = -650) windows. (a) Filter Back Projection (b) Hybrid-IR (c) AI DLR in Soft Tissue**

253 window; (d) Filter Back Projection (e) Hybrid-IR (f) AI DLR in Lung window. Note the  
254 calcifications are sharpest with AI DLR. Noise and artifacts are highest with FBP.

255 In general, there is substantial or near perfect agreement between all the AI DLR  
256 reconstructions and the Hybrid-IR reconstructions which is the current standard of care.

257 Patients with minimal calcium classification, did show substantial agreement with  $\kappa = 0.64 \pm$   
258 0.14. Lower measurements of calcium are more susceptible to noise in the measurements. It  
259 should be noted that interscan variability exists in CACS measurements. A number of factors  
260 including the choice of scanner can affect interscan variability, and the level of agreement in  
261 our study is less than variability that could be expected in general [24].

262 As reported in the results, patient dose was exponentially related to BMI Figure 3. This is  
263 consistent with previously studies investigating automated exposure control behavior [25].

264 AI DLR allows further dose reduction beyond the 1 mSv threshold set in this study for non-  
265 obese patients. Utilizing automated exposure control noise targets based on an AI DLR model  
266 rather than on Hybrid-IR model will allow for dose reductions of approximately 36% with  
267 improved image quality [26]. Further dose reduction can then be accomplished by utilizing a  
268 higher standard deviation of the noise (above 45) as the AI DLR image quality was improved  
269 compared with the Hybrid-IR image quality [20].

270 In conclusion, further dose reduction can be accomplished while maintaining image quality at  
271 or better than at current Hybrid-IR levels. We will target a dose reduction of at least a 37% for  
272 all patients. Accepting a linear, no threshold model of radiation risk [9, 27, 28] this we expect a  
273 similar reduction of radiation risk for all patients.

274 **TAKE HOME POINTS**

275 1. AI DLR has been quantitatively and qualitatively validated for use in CACS on 4 cm coverage

276 CT scanner.

277 2. AI DLR produces qualitatively better image quality than HYBRID-IR at the same dose level,

278 while producing good agreement in categorization with Agatston scores.

279 3. AI DLR will allow for at least a 37% further dose reduction on a 4 cm coverage CT scanner.

280

281

282

283

284

285

286

287

288

289

290

291

292 **BIBLIOGRAHY**

- 293 1. Malguria N, Zimmerman S, Fishman EK. Coronary Artery Calcium Scoring: Current Status  
294 and Review of Literature. *J Comput Assist Tomogr*. 2018 Nov/Dec;42(6):887-897. doi:  
295 10.1097/RCT.0000000000000825. PMID: 30422915.
- 296 2. Chang SM, Nabi F, Xu J, Pratt CM, Mahmarian AC, Frias ME, Mahmarian JJ. Value of CACS  
297 compared with ETT and myocardial perfusion imaging for predicting long-term cardiac  
298 outcome in asymptomatic and symptomatic patients at low risk for coronary disease:  
299 clinical implications in a multimodality imaging world. *JACC Cardiovasc Imaging*. 2015  
300 Feb;8(2):134-44. doi: 10.1016/j.jcmg.2014.11.008. PMID: 25677886.
- 301 3. Budoff, M, Shaw, L, Liu, S. et al. Long-Term Prognosis Associated With Coronary  
302 Calcification: Observations From a Registry of 25,253 Patients. *JACC*. 2007 May, 49 (18)  
303 1860–1870. <https://doi.org/10.1016/j.jacc.2006.10.079>
- 304 4. Sarwar A, Shaw LJ, Shapiro MD, Blankstein R, Hoffmann U, Cury RC, Abbara S, Brady TJ,  
305 Budoff MJ, Blumenthal RS, Nasir K. Diagnostic and prognostic value of absence of coronary  
306 artery calcification. *JACC Cardiovasc Imaging*. 2009 Jun;2(6):675-88. doi:  
307 10.1016/j.jcmg.2008.12.031. Erratum in: *JACC Cardiovasc Imaging*. 2010 Oct;3(10):1089.  
308 Hoffman, Udo. PMID: 19520336.
- 309 5. McCollough CH, Ulzheimer S, Halliburton SS, Shanneik K, White RD, Kalender WA. Coronary  
310 artery calcium: a multi-institutional, multi-manufacturer international standard for  
311 quantification at cardiac CT. *Radiology*. 2007 May;243(2):527-38. doi:  
312 10.1148/radiol.2432050808. PMID: 17456875.



- 313 6. Shreya D, Zamora DI, Patel GS, Grossmann I, Rodriguez K, Soni M, Joshi PK, Patel SC, Sange  
314 I. Coronary Artery Calcium Score - A Reliable Indicator of Coronary Artery Disease? *Cureus*.  
315 2021 Dec 3;13(12):e20149. doi: 10.7759/cureus.20149. PMID: 35003981; PMCID:  
316 PMC8723785.
- 317 7. Marwan M, Mettin C, Pflederer T, Seltmann M, Schuhbäck A, Muschiol G, Ropers D, Daniel  
318 WG, Achenbach S. Very low-dose coronary artery calcium scanning with high-pitch spiral  
319 acquisition mode: comparison between 120-kV and 100-kV tube voltage protocols. *J*  
320 *Cardiovasc Comput Tomogr*. 2013 Jan-Feb;7(1):32-8. doi: 10.1016/j.jcct.2012.11.004. Epub  
321 2012 Dec 1. PMID: 23333186.
- 322 8. Cao CF, Ma KL, Shan H, Liu TF, Zhao SQ, Wan Y, Jun-Zhang, Wang HQ. CT Scans and Cancer  
323 Risks: A Systematic Review and Dose-response Meta-analysis. *BMC Cancer*. 2022 Nov  
324 30;22(1):1238. doi: 10.1186/s12885-022-10310-2. PMID: 36451138; PMCID: PMC9710150.
- 325 9. Little, M.P., Wakeford, R., Tawn, E.J., Bouffler, S.D., & De Gonzalez, A.B. (2009). Risks  
326 Associated with Low Doses and Low Dose Rates of Ionizing Radiation: Why Linearity May  
327 Be (Almost) the Best We Can Do. *Radiology*, 251(1), 6-12.  
328 <https://doi.org/10.1148/radio.2511081686>
- 329 10. Einstein AJ, Henzlova MJ, Rajagopalan S. Estimating risk of cancer associated with radiation  
330 exposure from 64-slice computed tomography coronary angiography. *JAMA*. 2007 Jul  
331 18;298(3):317-23. doi: 10.1001/jama.298.3.317. PMID: 17635892
- 332 11. BE. Earth, D.O. (2006). *Health Risks from Exposure to Low Levels of Ionizing Radiation: BEIR*  
333 *VII Phase 2*.

334 [https://openlibrary.org/books/OL18209291M/Health\\_risks\\_from\\_exposure\\_to\\_low\\_levels](https://openlibrary.org/books/OL18209291M/Health_risks_from_exposure_to_low_levels)  
335 [\\_of\\_ionizing\\_radiation\\_BEIR\\_VII\\_Phase\\_2.](https://openlibrary.org/books/OL18209291M/Health_risks_from_exposure_to_low_levels)

336 12. Choi AD, Leifer ES, Yu JH, Datta T, Bronson KC, Rollison SF, Schuzer JL, Steveson C,  
337 Shanbhag SM, Chen MY. Reduced radiation dose with model based iterative reconstruction  
338 coronary artery calcium scoring. *Eur J Radiol.* 2019 Feb;111:1-5. doi:  
339 10.1016/j.ejrad.2018.12.010. Epub 2018 Dec 8. PMID: 30691659.

340 13. Takahashi M, Kimura F, Umezawa T, Watanabe Y, Ogawa H. Comparison of adaptive  
341 statistical iterative and filtered back projection reconstruction techniques in quantifying  
342 coronary calcium. *J Cardiovasc Comput Tomogr.* 2016 Jan-Feb;10(1):61-8. doi:  
343 10.1016/j.jcct.2015.07.012. Epub 2015 Jul 29. PMID: 26276567.

344 14. Choi AD, Leifer ES, Yu J, Shanbhag SM, Bronson K, Arai AE, Chen MY. Prospective evaluation  
345 of the influence of iterative reconstruction on the reproducibility of coronary calcium  
346 quantification in reduced radiation dose 320 detector row CT. *J Cardiovasc Comput*  
347 *Tomogr.* 2016 Sep-Oct;10(5):359-63. doi: 10.1016/j.jcct.2016.07.016. Epub 2016 Jul 27.  
348 PMID: 27591767; PMCID: PMC7458582.

349 15. Tatsugami F, Higaki T, Fukumoto W, Kaichi Y, Fujioka C, Kiguchi M, Yamamoto H, Kihara Y,  
350 Awai K. Radiation dose reduction for coronary artery calcium scoring at 320-detector CT  
351 with adaptive iterative dose reduction 3D. *Int J Cardiovasc Imaging.* 2015 Jun;31(5):1045-  
352 52. doi: 10.1007/s10554-015-0637-7. Epub 2015 Mar 10. PMID: 25754302.

353 16. Chen MY, Steigner ML, Leung SW, Kumamaru KK, Schultz K, Mather RT, Arai AE, Rybicki FJ.  
354 Simulated 50 % radiation dose reduction in coronary CT angiography using adaptive  
355 iterative dose reduction in three-dimensions (AIDR3D). *Int J Cardiovasc Imaging.* 2013

- 356 Jun;29(5):1167-75. doi: 10.1007/s10554-013-0190-1. Epub 2013 Feb 13. PMID: 23404384;  
357 PMCID: PMC3701132.
- 358 17. Yin WH, Lu B, Li N, Han L, Hou ZH, Wu RZ, Wu YJ, Niu HX, Jiang SL, Krazinski AW,  
359 Ebersberger U, Meinel FG, Schoepf UJ. Iterative reconstruction to preserve image quality  
360 and diagnostic accuracy at reduced radiation dose in coronary CT angiography: an  
361 intraindividual comparison. *JACC Cardiovasc Imaging*. 2013 Dec;6(12):1239-49. doi:  
362 10.1016/j.jcmg.2013.08.008. Epub 2013 Oct 23. PMID: 24269265.
- 363 18. Tatsugami F, Higaki T, Nakamura Y, Yu Z, Zhou J, Lu Y, Fujioka C, Kitagawa T, Kihara Y, Iida  
364 M, Awai K. Deep learning-based image restoration algorithm for coronary CT angiography.  
365 *Eur Radiol*. 2019 Oct;29(10):5322-5329. doi: 10.1007/s00330-019-06183-y. Epub 2019 Apr  
366 8. PMID: 30963270
- 367 19. Chen MY, Steigner ML, Leung SW, Kumamaru KK, Schultz K, Mather RT, Arai AE, Rybicki FJ.  
368 Simulated 50 % radiation dose reduction in coronary CT angiography using adaptive  
369 iterative dose reduction in three-dimensions (AIDR3D). *Int J Cardiovasc Imaging*. 2013  
370 Jun;29(5):1167-75. doi: 10.1007/s10554-013-0190-1. Epub 2013 Feb 13. PMID: 23404384;  
371 PMCID: PMC3701132.
- 372 20. Otgonbaatar C, Jeon PH, Ryu JK, Shim H, Jeon SH, Ko SM, Kim H. Coronary artery calcium  
373 quantification: comparison between filtered-back projection, hybrid iterative  
374 reconstruction, and deep learning reconstruction techniques. *Acta Radiol*. 2023  
375 Aug;64(8):2393-2400. doi: 10.1177/02841851231174463. Epub 2023 May 21. PMID:  
376 37211615.

- 377 21. Higaki T, Nakamura Y, Zhou J, Yu Z, Nemoto T, Tatsugami F, Awai K. Deep Learning  
378 Reconstruction at CT: Phantom Study of the Image Characteristics. Acad Radiol. 2020  
379 Jan;27(1):82-87. doi: 10.1016/j.acra.2019.09.008. PMID: 31818389.
- 380 22. American Association of Physicists in Medicine Report # 96; The Measurement, Reporting,  
381 and Management of Radiation dose in CT; Report of AAPM task Group 23 of the Diagnostic  
382 Imaging Council CT Committee; January, 2008
- 383 23. Mitani AA, Freer PE, Nelson KP. Summary measures of agreement and association between  
384 many raters' ordinal classifications. Ann Epidemiol. 2017 Oct;27(10):677-685.e4. doi:  
385 10.1016/j.annepidem.2017.09.001. Epub 2017 Sep 22. PMID: 29029991; PMCID:  
386 PMC5687310.
- 387 24. Kaitlin B. Baron KB, Choi AD, Chen MY. Low Radiation Dose Calcium Scoring: Evidence and  
388 Techniques. Curr Cardiovasc Imaging Rep. Epub 2016 March; (2016) 9:12; doi:  
389 10.1007/s12410-016-9373-1
- 390 25. Inoue Y, Itoh H, Nagahara K, Hata H, Mitsui K. Relationships of Radiation Dose Indices with  
391 Body Size Indices in Adult Body Computed Tomography. Tomography. 2023 Jul  
392 14;9(4):1381-1392. doi: 10.3390/tomography9040110. PMID: 37489478; PMCID:  
393 PMC10366833.
- 394 26. Hoe, J., & Tan, C. (2022, September) Advanced intelligent Clear-IQ Engine in Clinical  
395 Practice, White Paper. Canon Medical Systems.  
396 [https://global.medical.canon/publication/ct/V53\\_04\\_MOIGE0040EAB\\_SYMPOSIUM](https://global.medical.canon/publication/ct/V53_04_MOIGE0040EAB_SYMPOSIUM).
- 397 27. Little MP, Wakeford R, Tawn EJ, Bouffler SD, Berrington de Gonzalez A. Risks associated  
398 with low doses and low dose rates of ionizing radiation: why linearity may be (almost) the

399 best we can do. Radiology. 2009 Apr;251(1):6-12. doi: 10.1148/radiol.2511081686. PMID:  
400 19332841; PMCID: PMC2663578.

401 28. Mettler FA, Upton AC, Chapter 4 - Cancer Induction and Dose-Response Models, Editor(s):  
402 Fred A. Mettler, Arthur C. Upton, Medical Effects of Ionizing Radiation (Third Edition), W.B.  
403 Saunders, 2008, Pages 71-115.

# Mean CACS

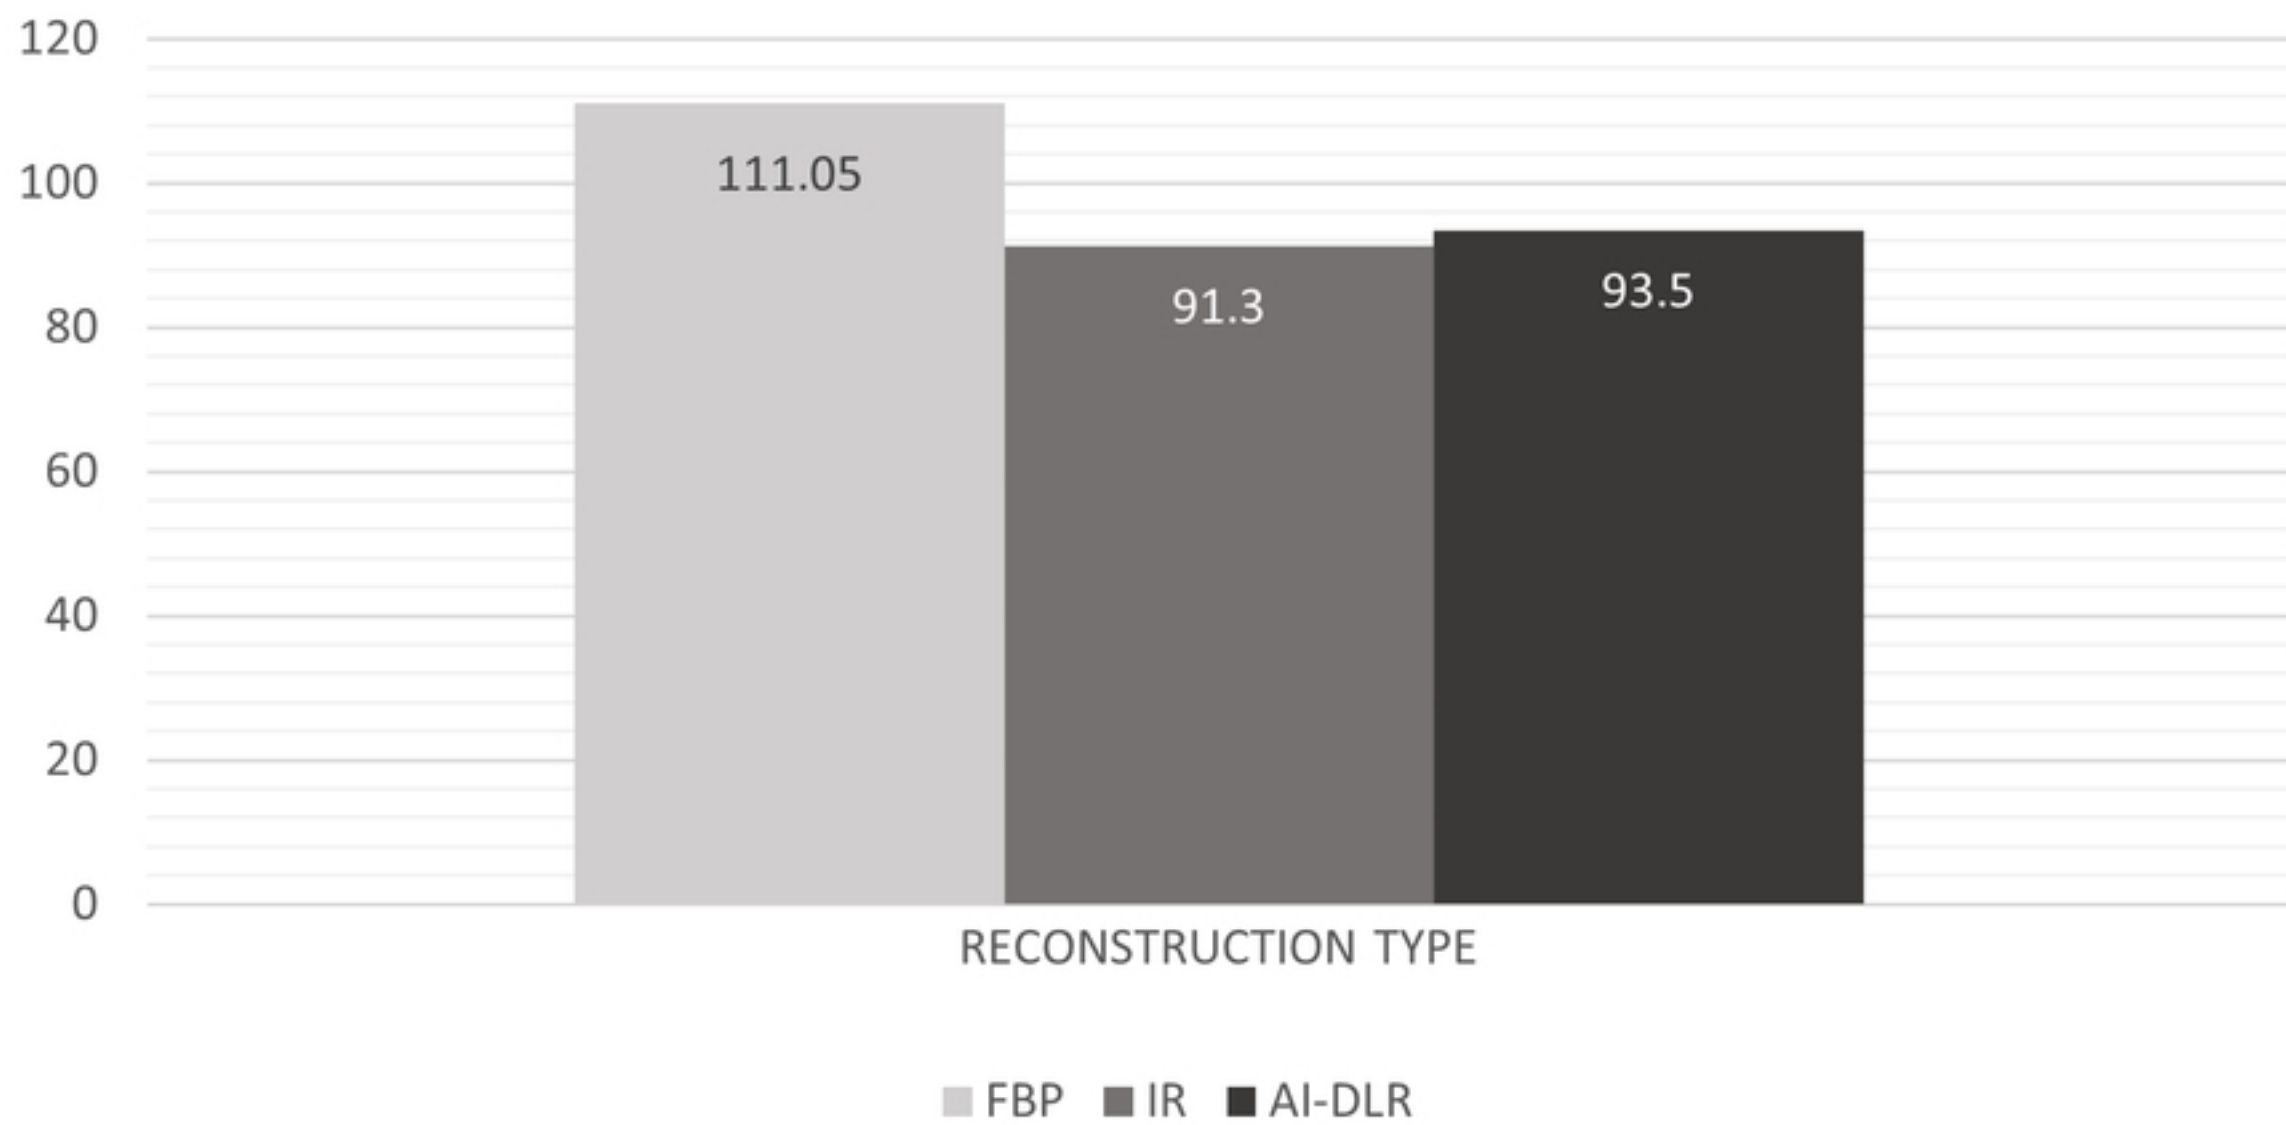

Figure 1

## CACS Frequencies

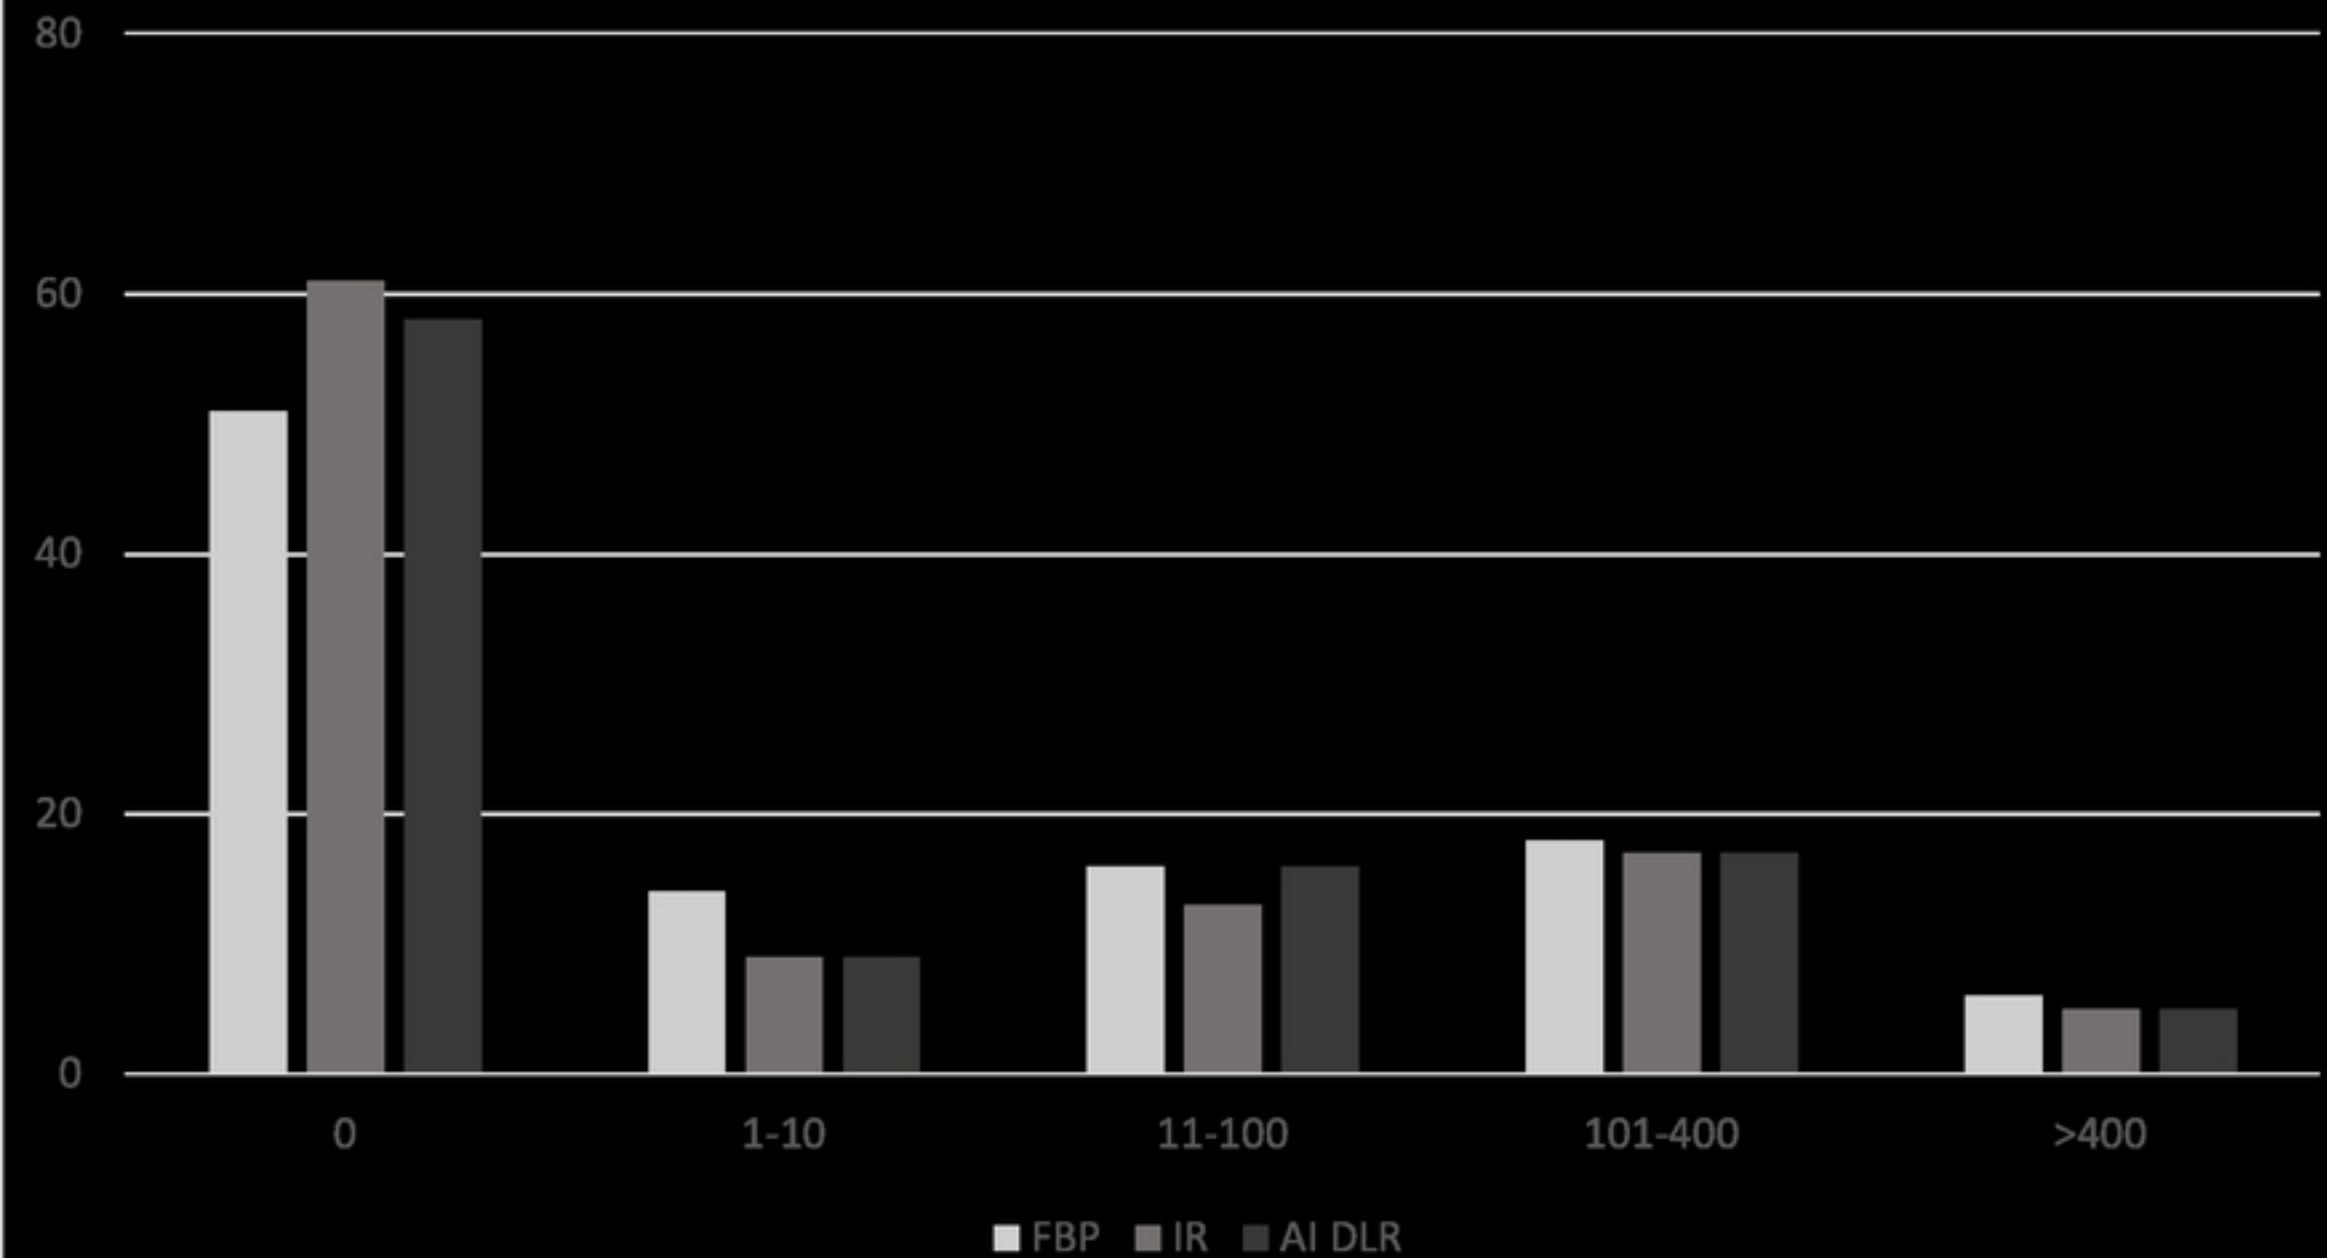

Figure 2

# BMI vs Dose

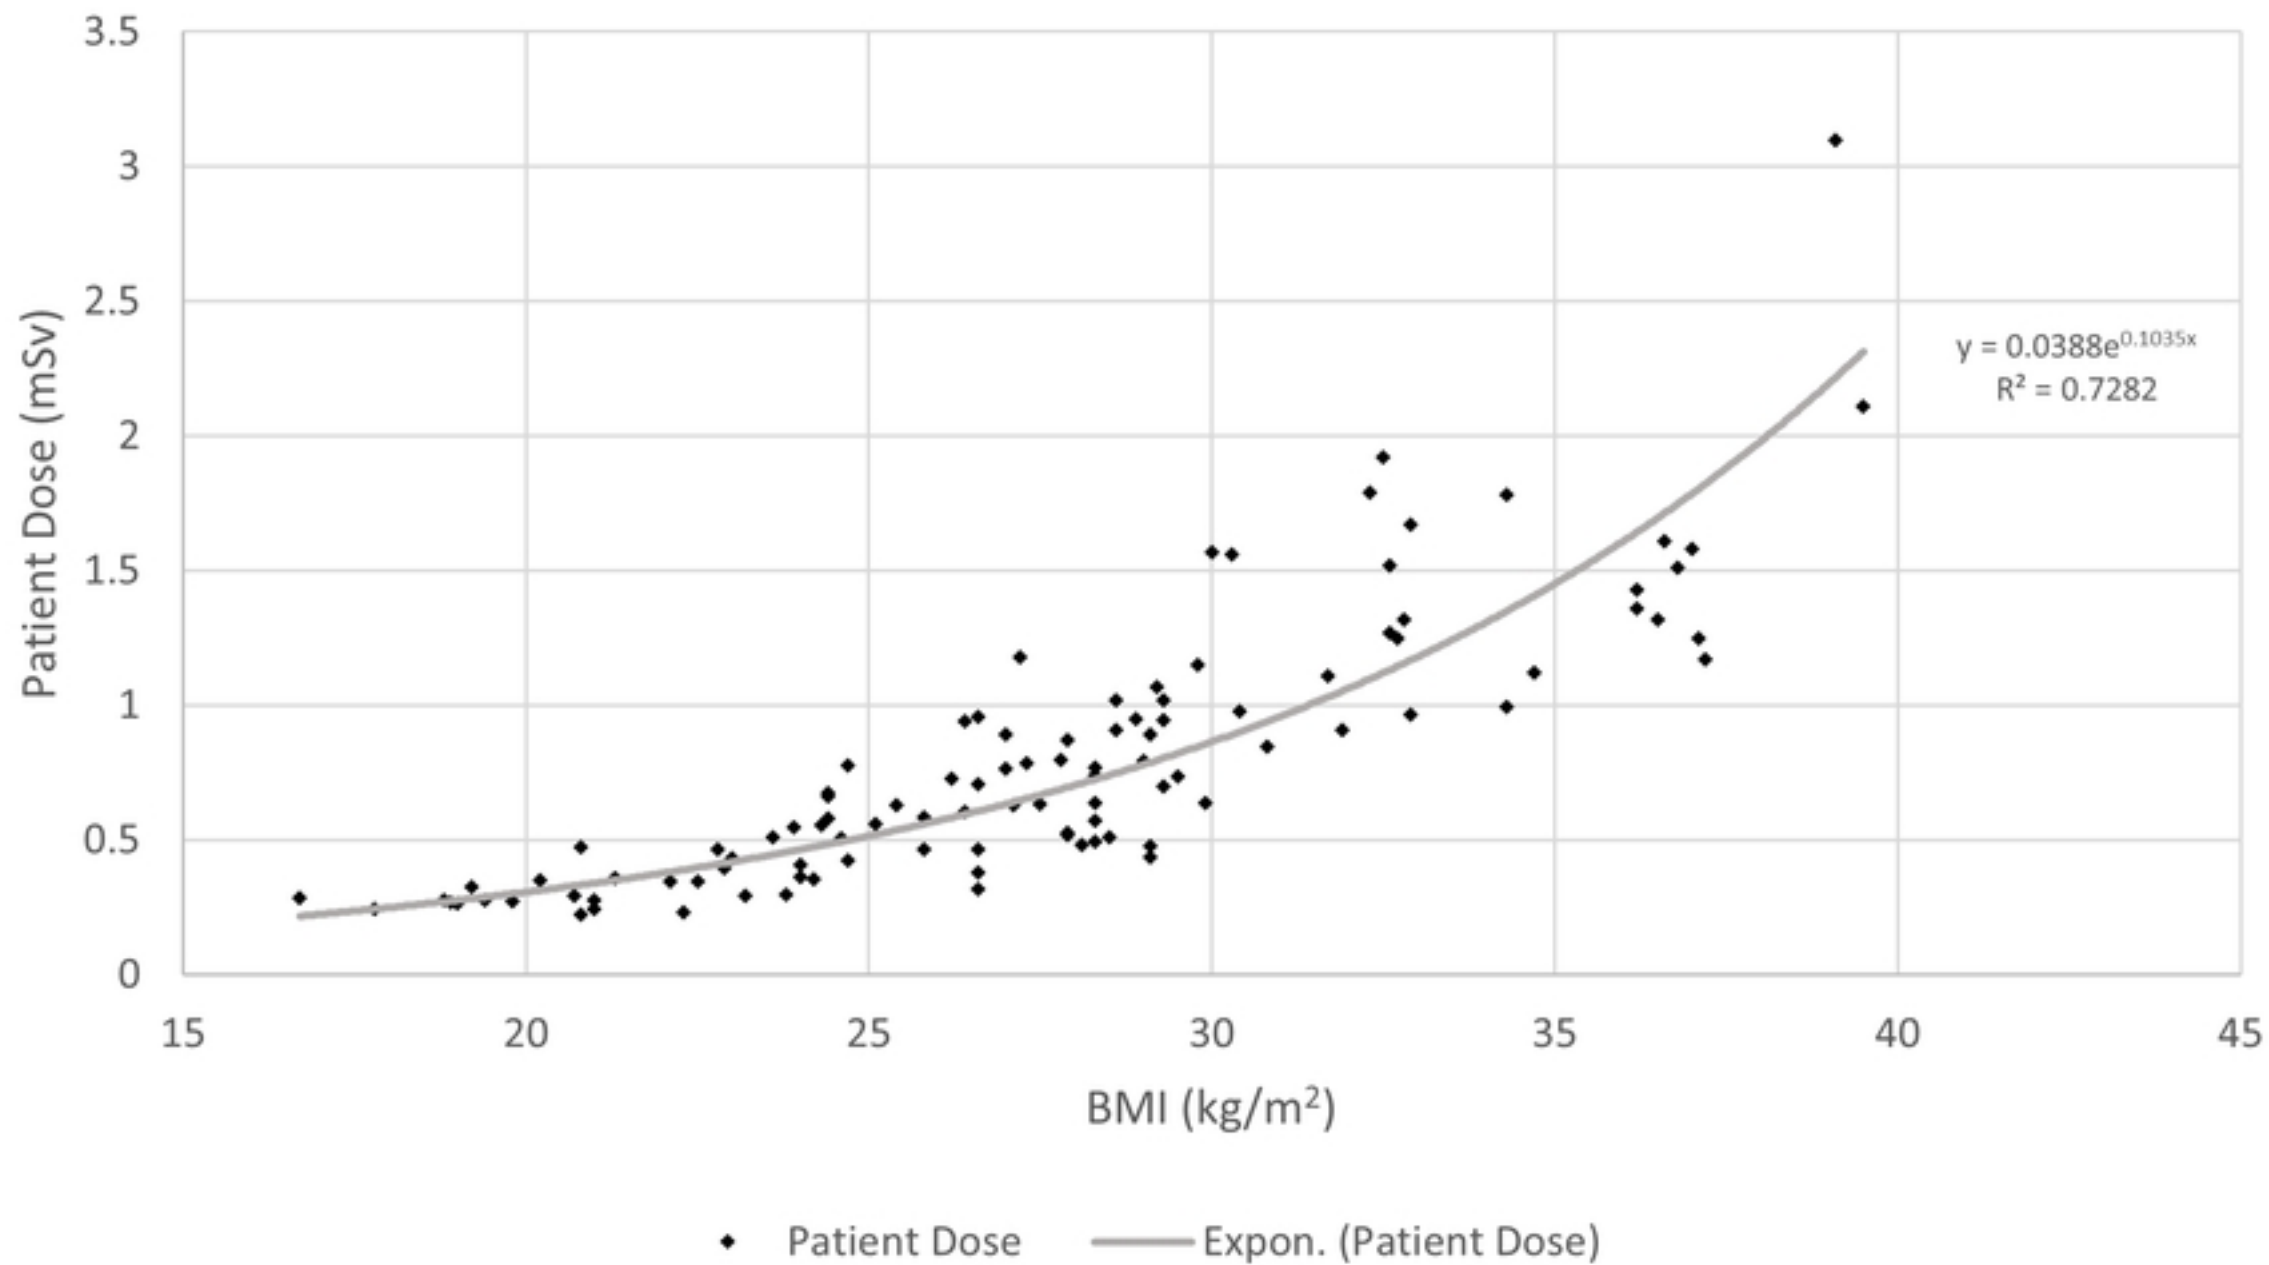

Figure 3



# Impact of SureExposure

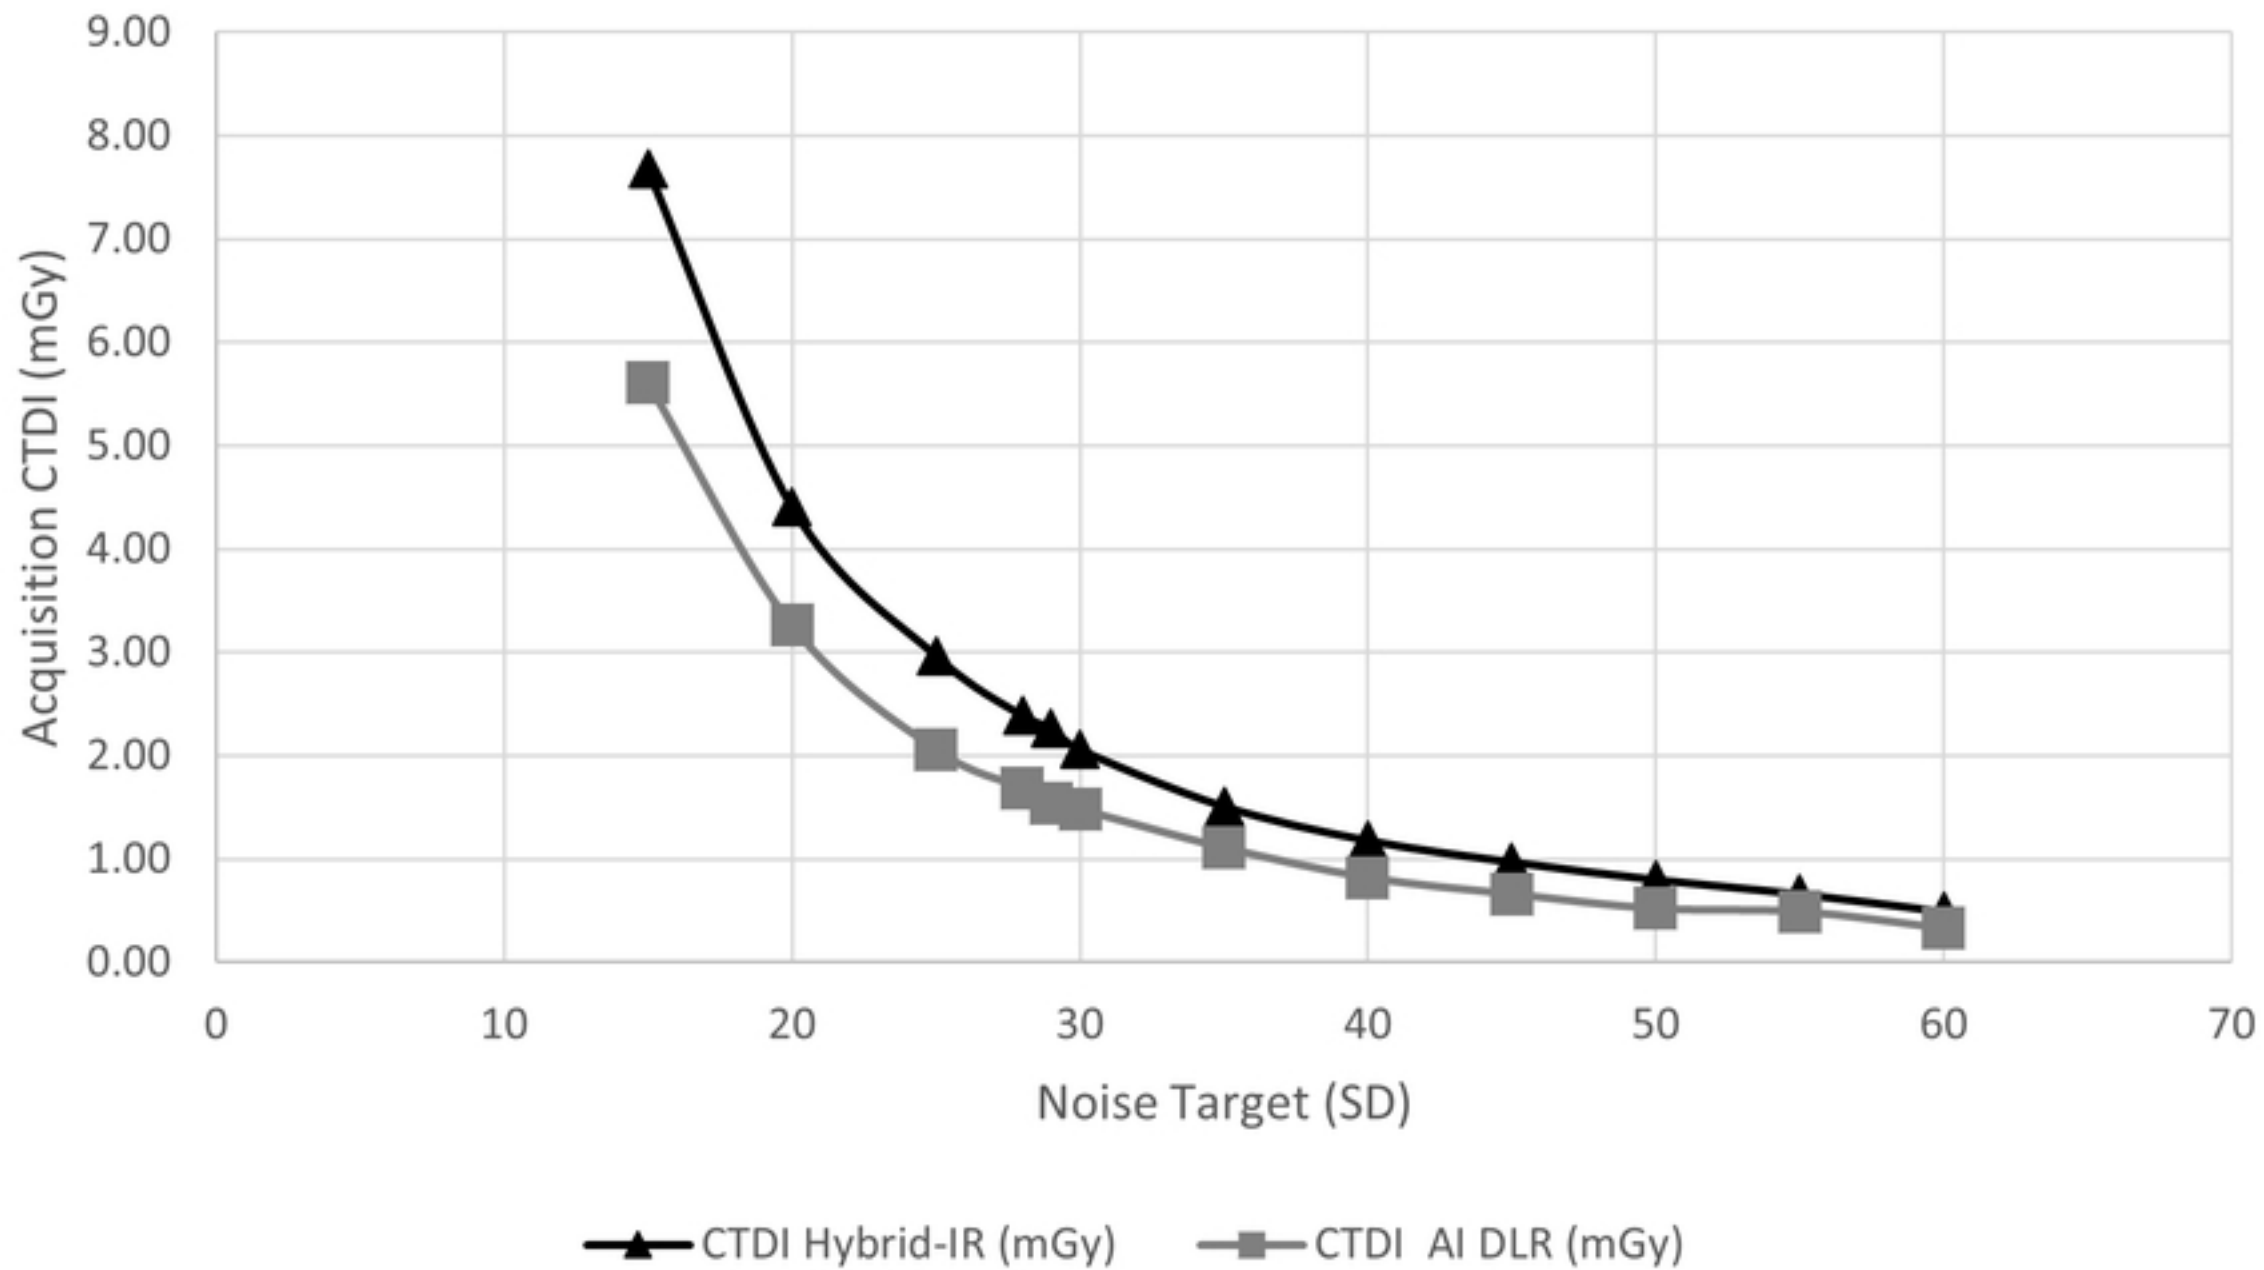

Figure 4

Noise vs. Dose

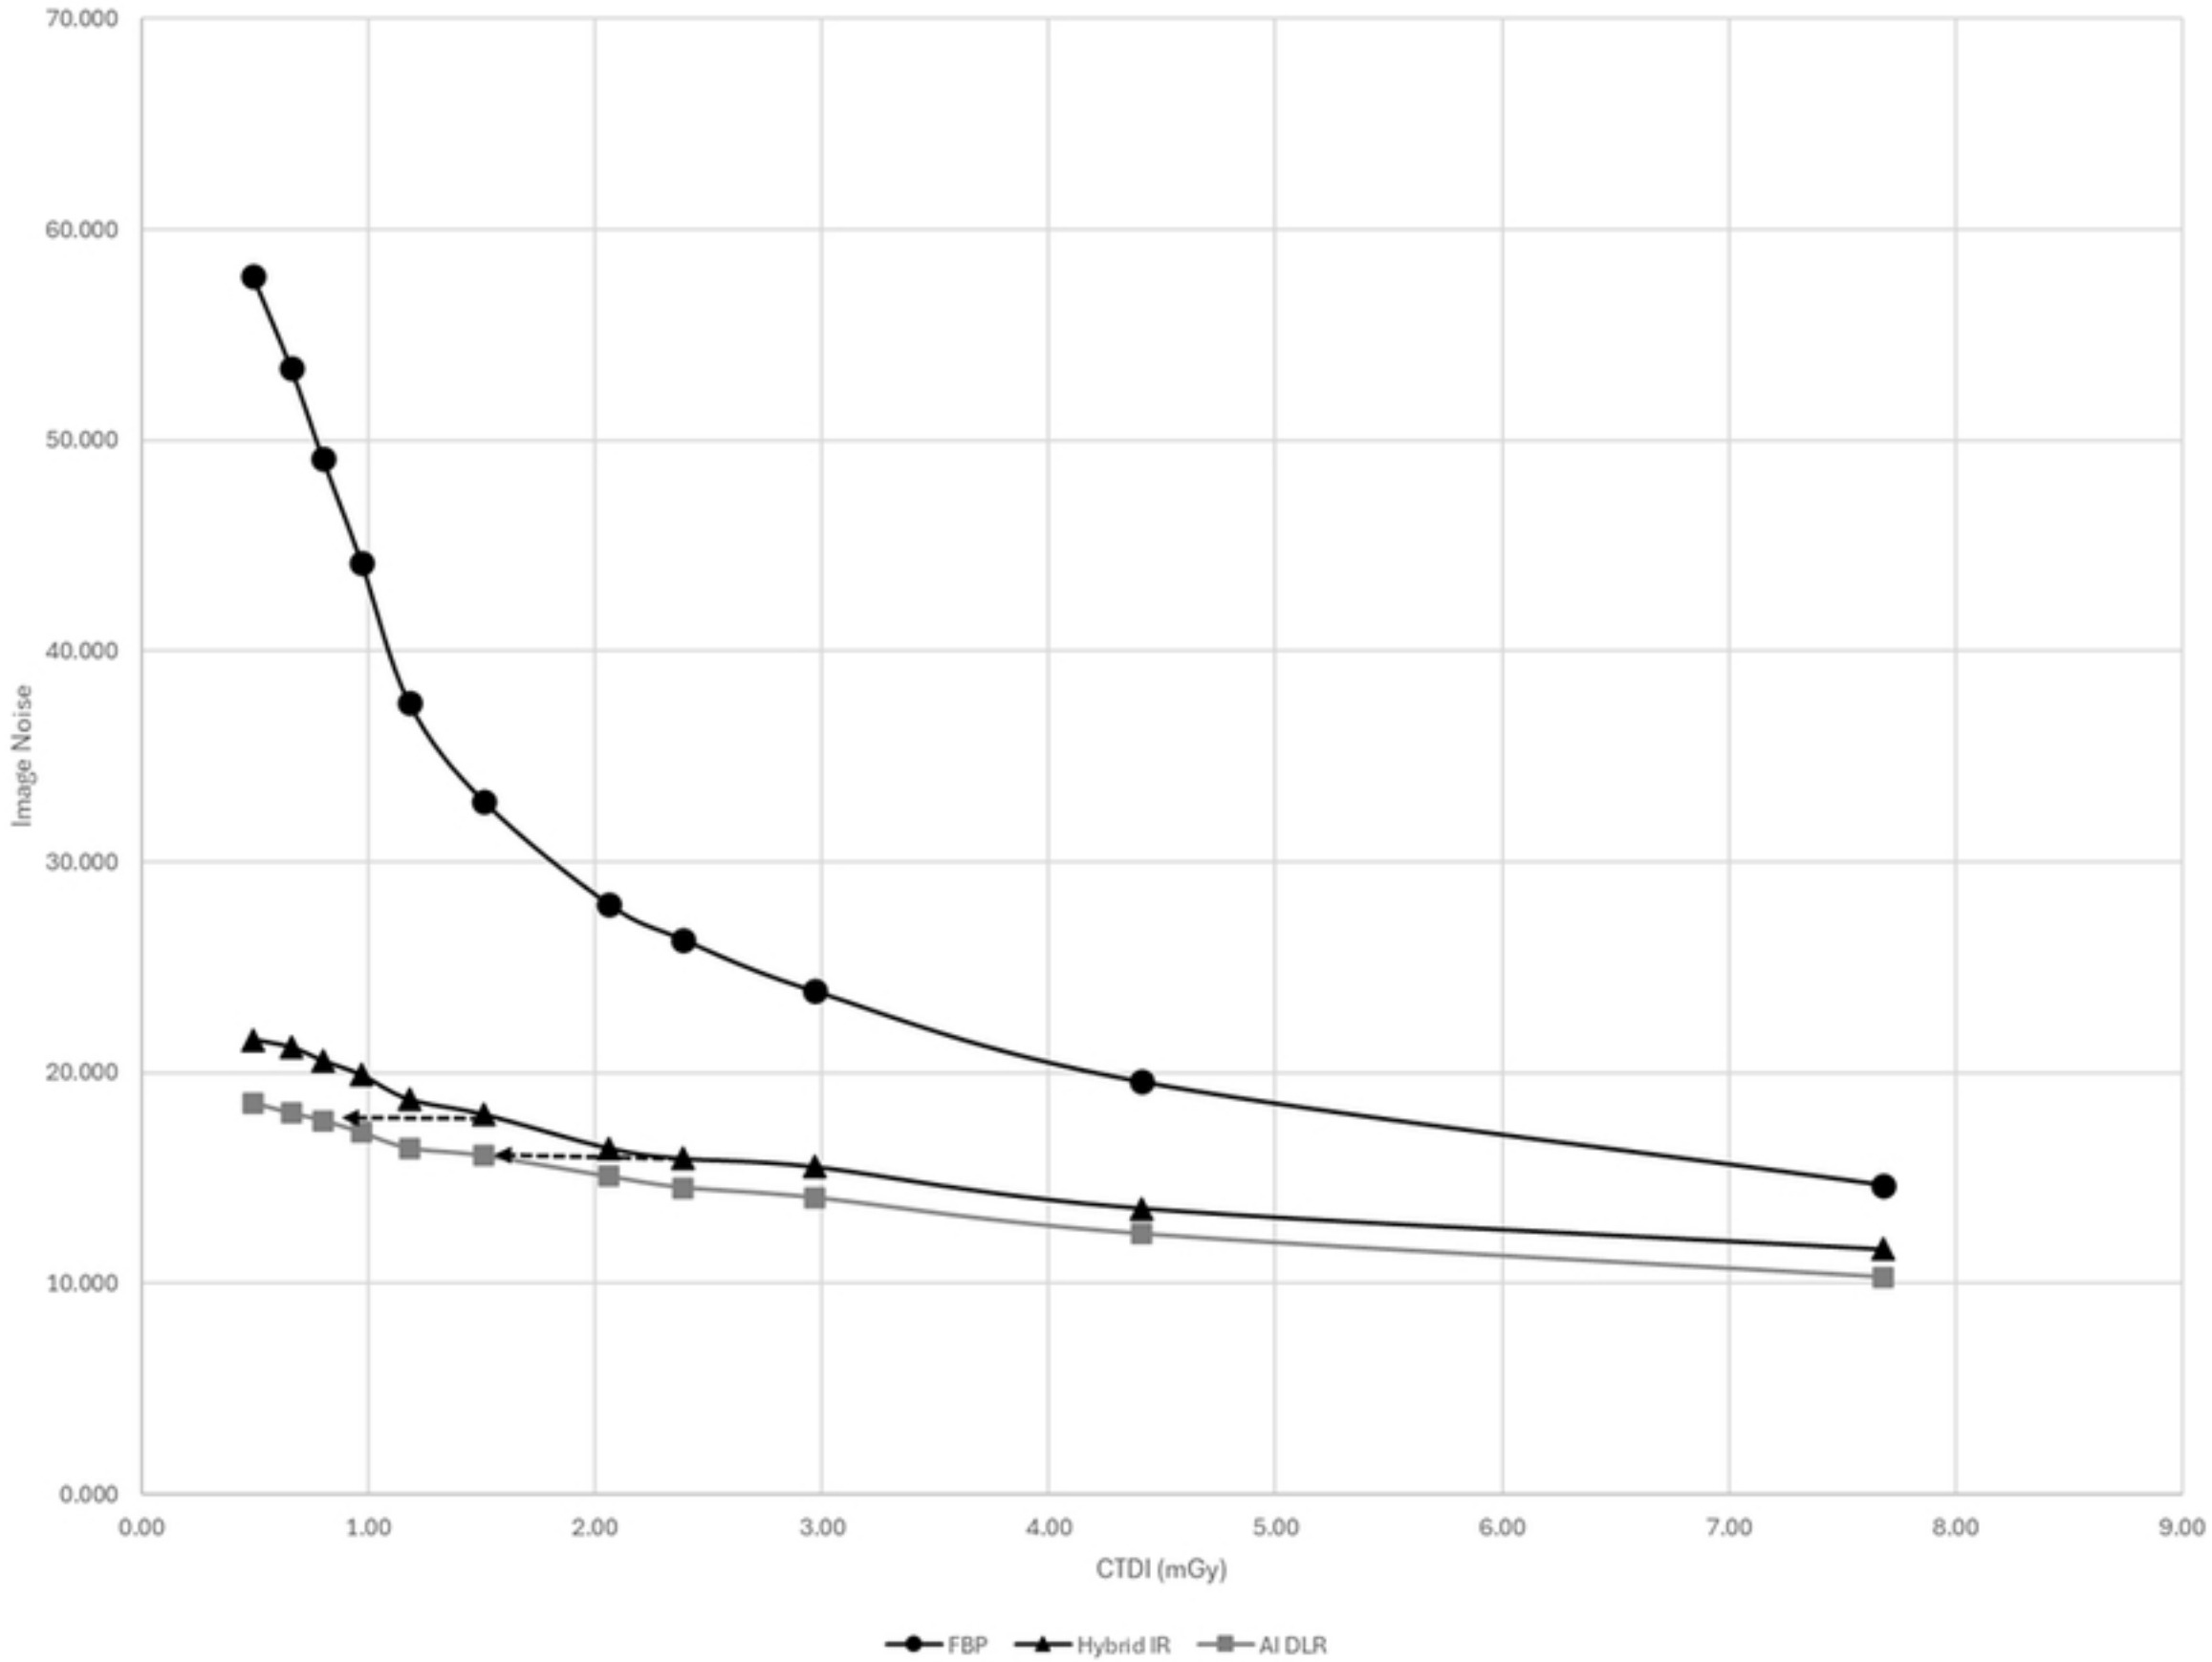

Figure 5

# Qualitative Image Quality

medRxiv preprint doi: <https://doi.org/10.1101/2024.10.30.24316447>; this version posted November 1, 2024. The copyright holder for this preprint (which was not certified by peer review) is the author/funder, who has granted medRxiv a license to display the preprint in perpetuity. It is made available under a [CC-BY 4.0 International license](https://creativecommons.org/licenses/by/4.0/).

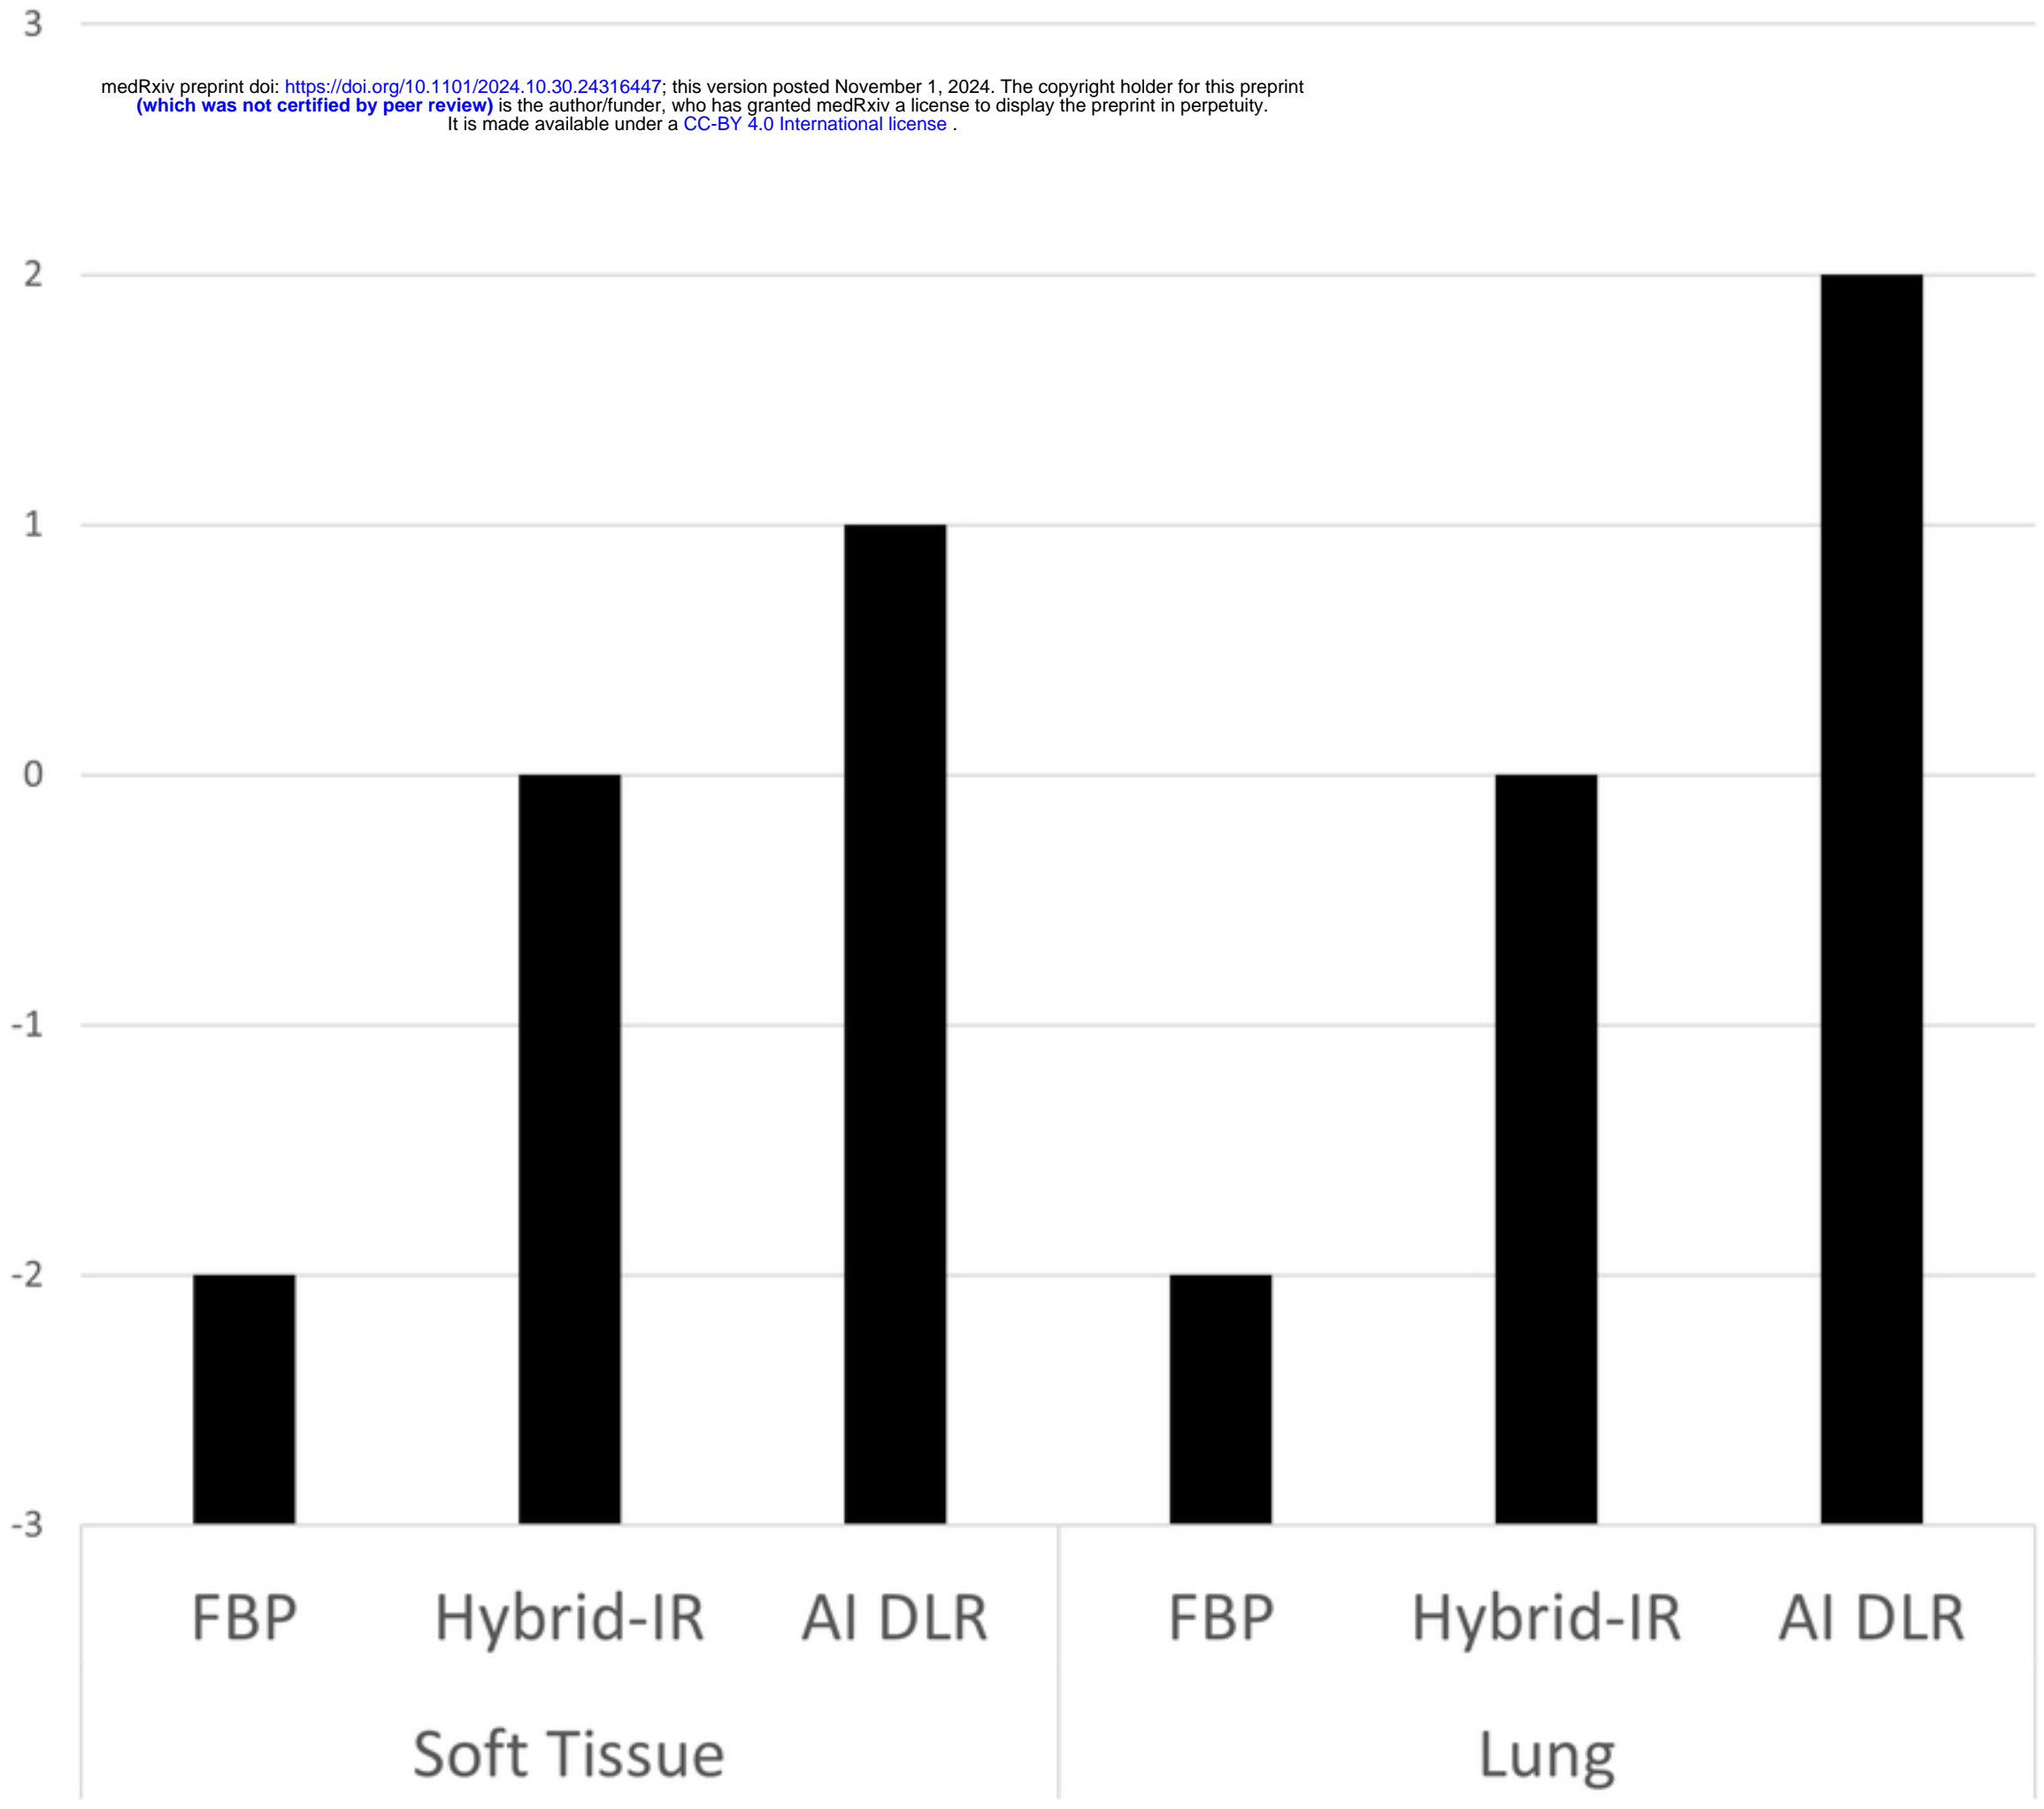

Figure 6

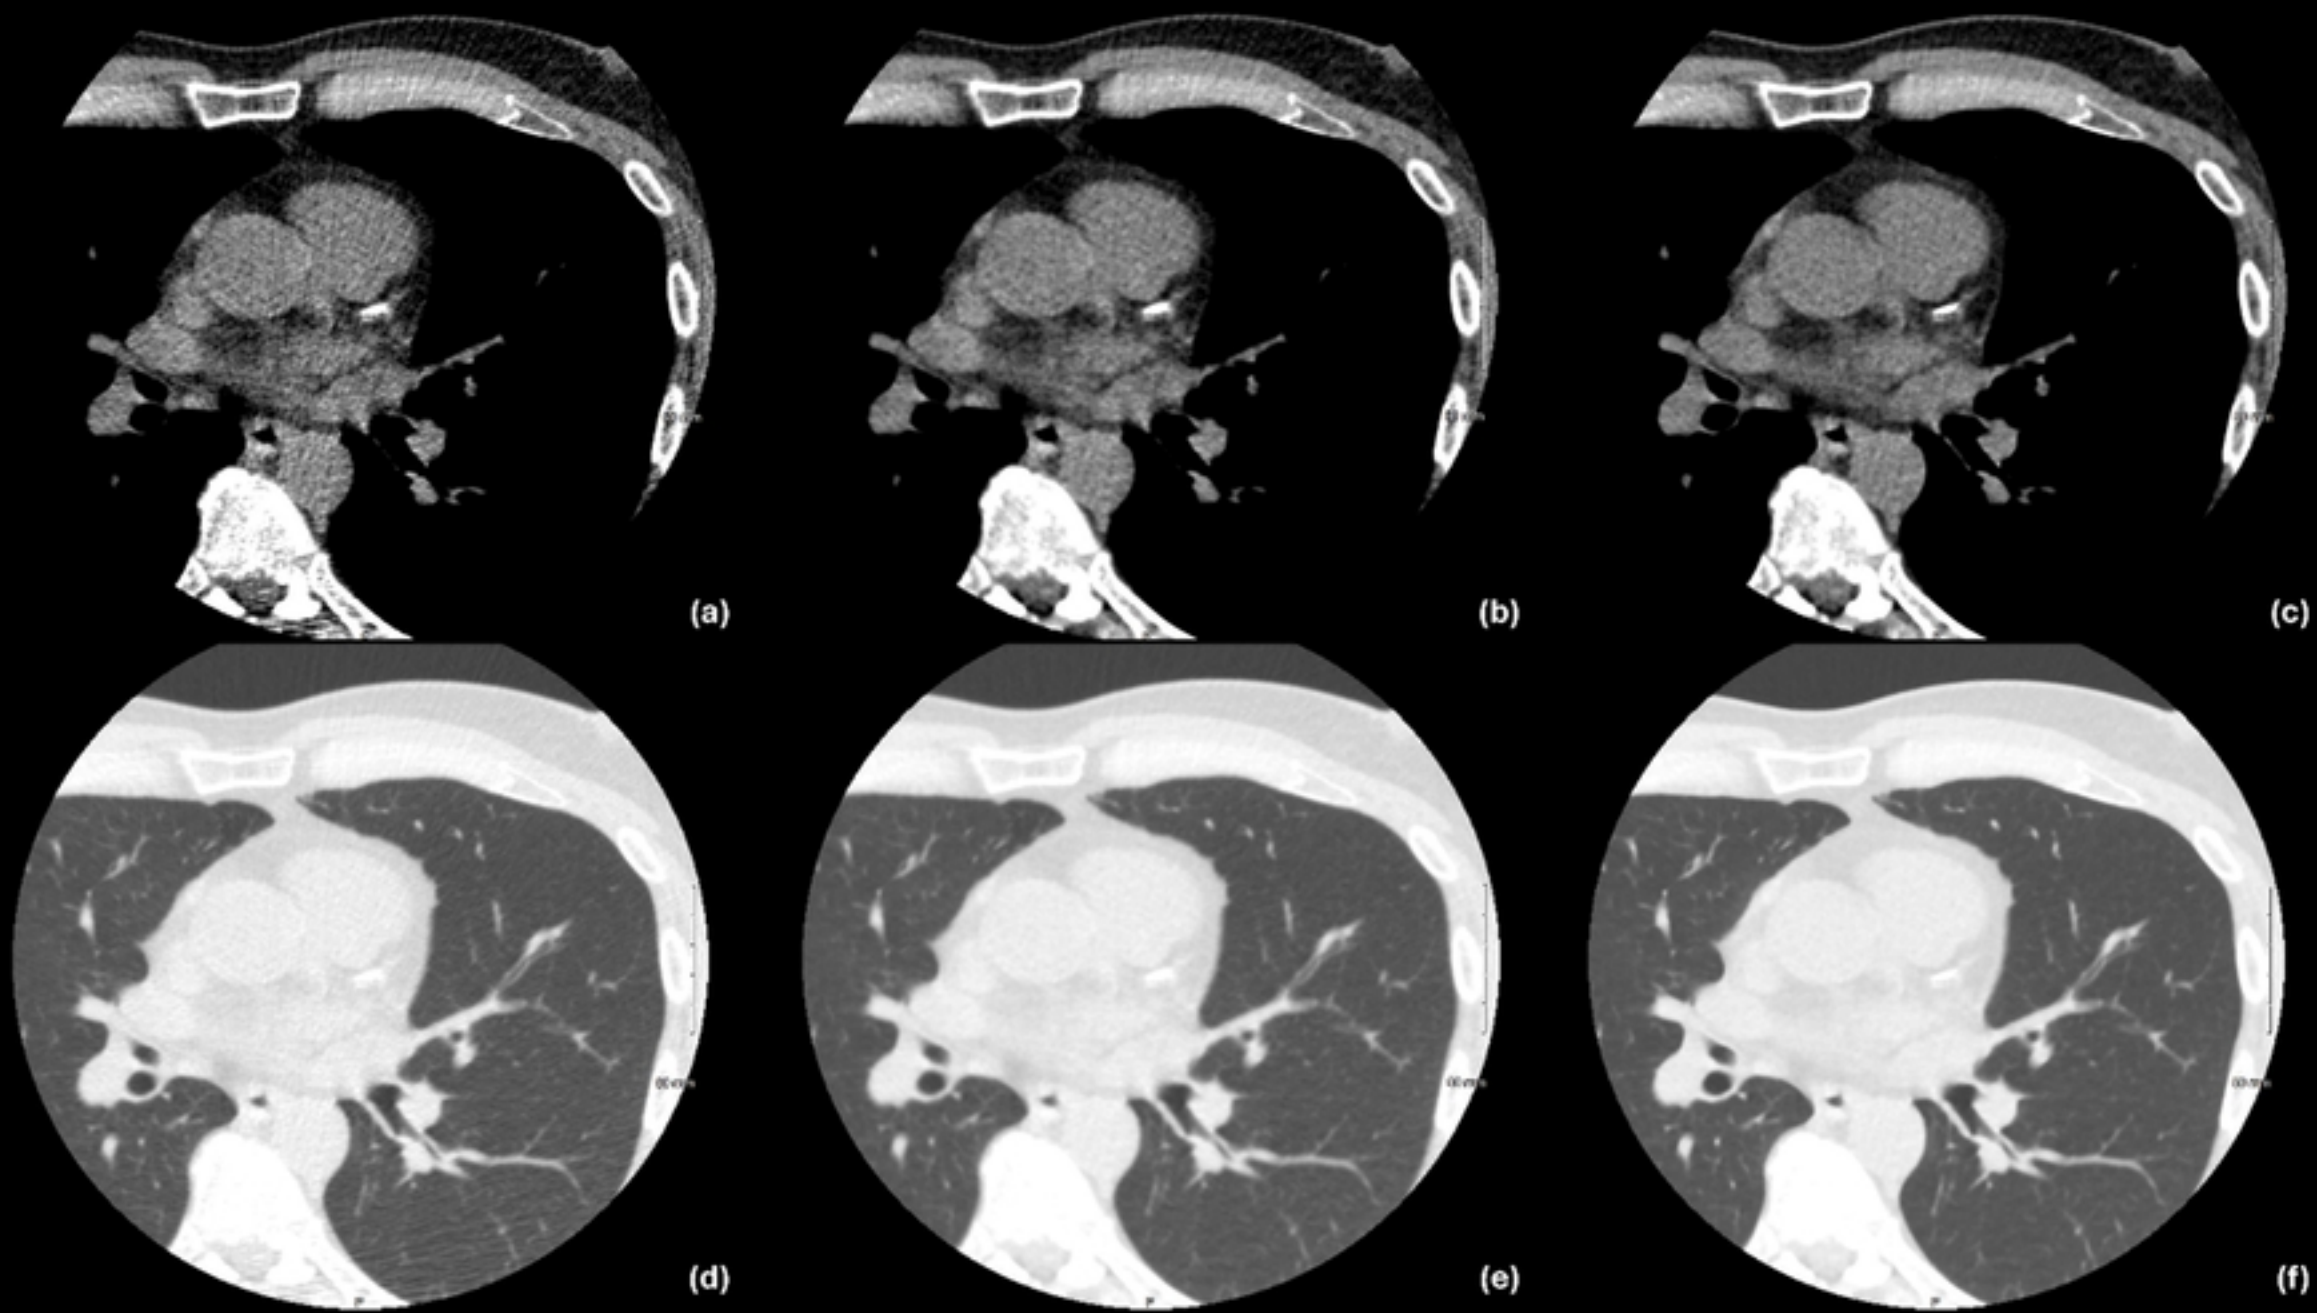

Figure 7
